# Supplementary material for: Polymorphism, phase transition, and physicochemical property investigation of Ensifentrine
Source: Royal Society of Chemistry journal article supplement (doi:10.1039/d4ce00410h), 2024-01-01
Supplement: d4ce00410h1.pdf [file d4ce00410h1.pdf]

## *Supporting Information For*

# **Polymorphism, phase transition and physicochemical properties investigation of Ensifentrine**

*Ananya Kar,<sup>a</sup> Lopamudra Giri, <sup>\*b</sup> Gowtham Kenguva,<sup>a</sup> Smruti Rekha Rout<sup>a</sup>, and Rambabu Dandela<sup>\*a</sup>*

<sup>a</sup>Department of Industrial and Engineering Chemistry, Institute of Chemical Technology-  
Indian Oil Bhubaneswar Campus, Bhubaneswar, India. E-mail:

[r.dandela@iocb.ictmumbai.edu.in](mailto:r.dandela@iocb.ictmumbai.edu.in)

<sup>b</sup>Department of Chemistry, Odisha University of Technology and Research, (Formerly CET),  
Bhubaneswar, India. E-mail: lopamudra7giri@gmail.com

|                                                                                                                                                                                                     |
|-----------------------------------------------------------------------------------------------------------------------------------------------------------------------------------------------------|
| <b>Contents</b>                                                                                                                                                                                     |
| <b>Figure S1.</b> PXRD patterns of Form I.                                                                                                                                                          |
| <b>Figure S2.</b> PXRD patterns of Form II.                                                                                                                                                         |
| <b>Figure S3.</b> PXRD patterns of Form III.                                                                                                                                                        |
| <b>Table S1.</b> Distinctive X-Ray Diffraction Peaks in ENSE Polymorphs.                                                                                                                            |
| Figure S4. Illustration of the formation of distinct forms under varied reaction environments. (a) rotary evaporation, (b) liquid-assisted grinding (LAG) and (c) LAG followed by slow-evaporation. |
| <b>Figure S5.</b> FT-IR spectra of various forms of ENSE.                                                                                                                                           |
| <b>Figure S6.</b> <sup>1</sup> H Spectra of (a) Form I, (b) Form II, and (c) Form III.                                                                                                              |
| <b>Figure S7.</b> <sup>13</sup> C Spectra of (a) Form I, (b) Form II, and (c) Form III.                                                                                                             |
| <b>Figure S8.</b> <sup>1</sup> H spectra overlay of all ENSE forms.                                                                                                                                 |

**Figure S9.**  $^{13}\text{C}$  spectra overlay of all ENSE forms.

**Figure S10.** TGA profiles of various forms of ENSE.

**Details of the solubility parameters of solid forms of ENSE**

**Figure S11.** ORTEP view of ENSE.Cl Salt. Herein, the ellipsoids are drawn with a 50% probability.

**Table S2.** Crystallographic Parameters of ENSE.Cl.Salt.

**Figure S12.** After the solubility test, a comparative PXRD overlay of all the solid forms of ENSE showed the production of discrete, stable adducts that matched the simulated pattern of ENSE.Cl Salt.

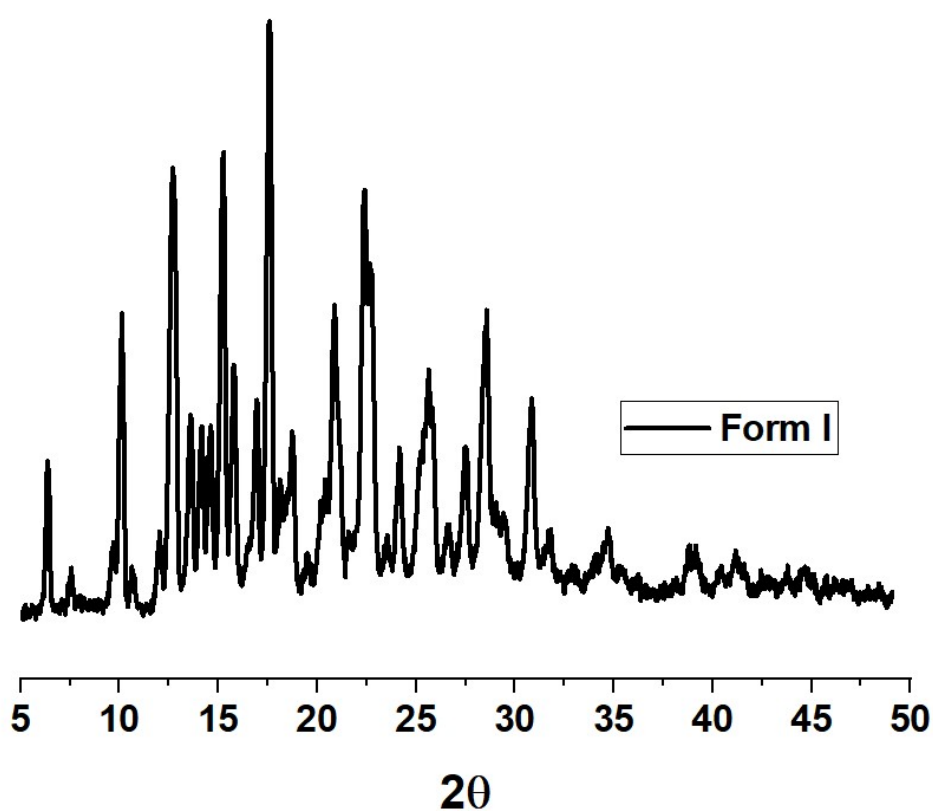

**Figure S1.** PXRD patterns of Form I.

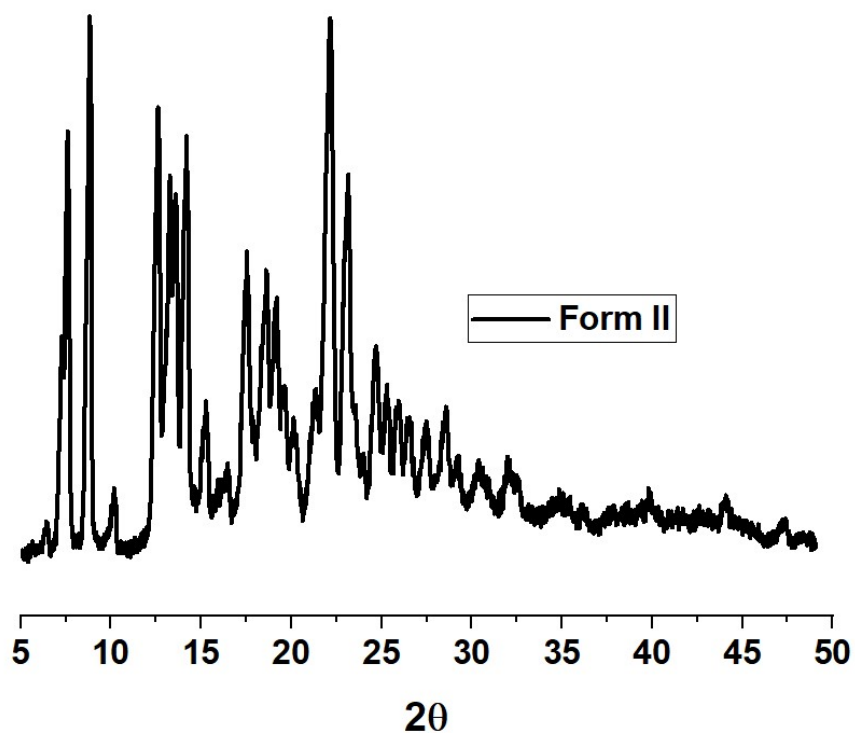

**Figure S2.** PXRD patterns of Form II.

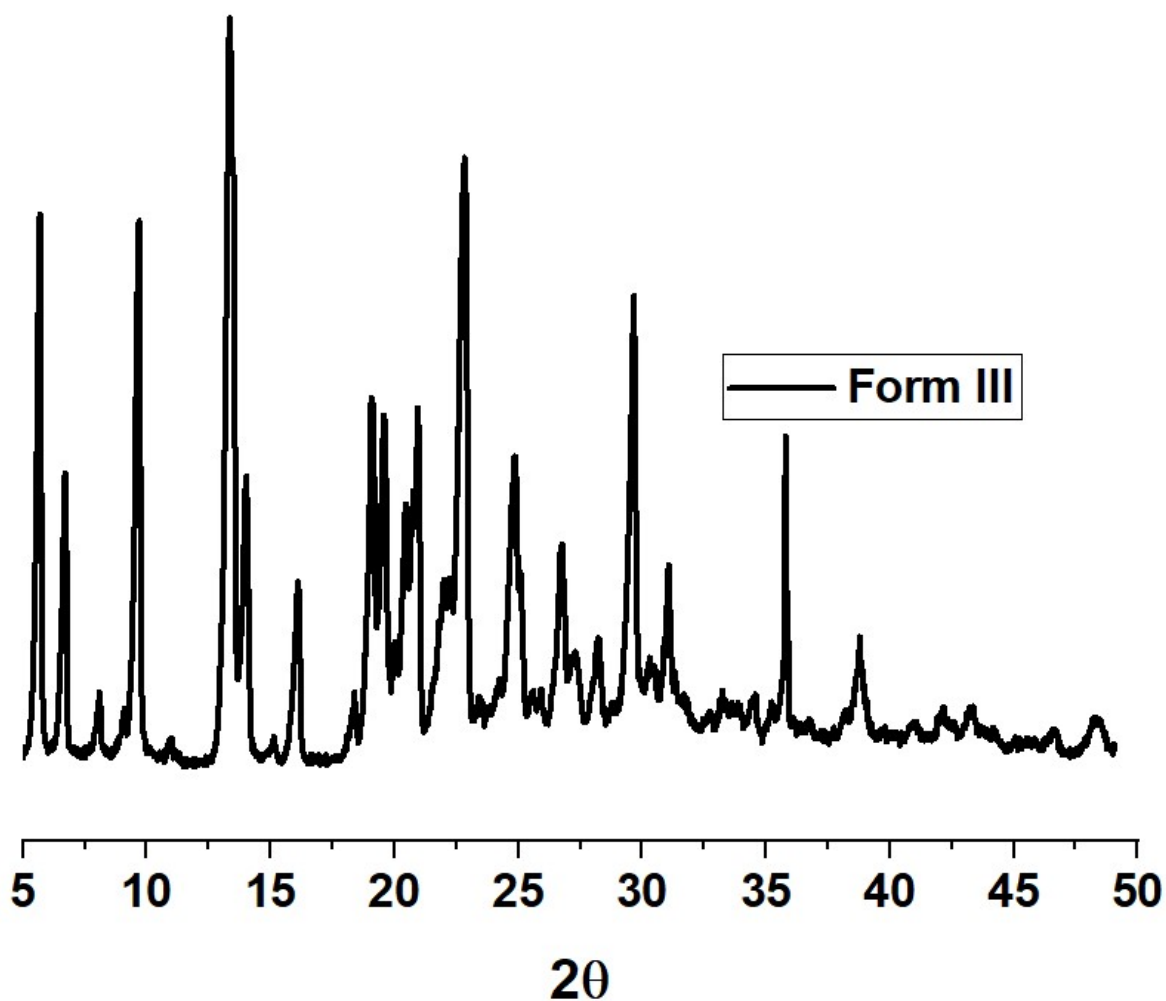

**Figure S3.** PXRD patterns of Form III.

**Table S1.** Distinctive X-Ray Diffraction Peaks in ENSE Polymorphs.

| Polymorphic form | Peaks [ $2\theta$ (deg)]                                                                                                   |
|------------------|----------------------------------------------------------------------------------------------------------------------------|
| Form I           | 6.4, 10.2, 12.8, 13.8, 14.6, 14.8, 15.4, 16.1, 17.2, 17.9, 19.1, 21.2, 22.8, 24.5, 26.1, 27.9, 29.1, 31.5                  |
| Form II          | 7.6, 8.9, 10.3, 12.8, 13.5, 14.4, 15.5, 17.8, 18.9, 19.5, 22.5, 23.5, 25.1, 25.7, 26.4, 27.1, 27.9, 29.1, 29.8, 30.9, 32.5 |
| Form III         | 5.6, 6.7, 9.7, 13.5, 14.2, 16.3, 19.4, 19.9, 20.7, 21.3, 23.2, 25.3, 27.2, 27.8, 28.7, 30.2, 31.6, 36.4, 39.5              |

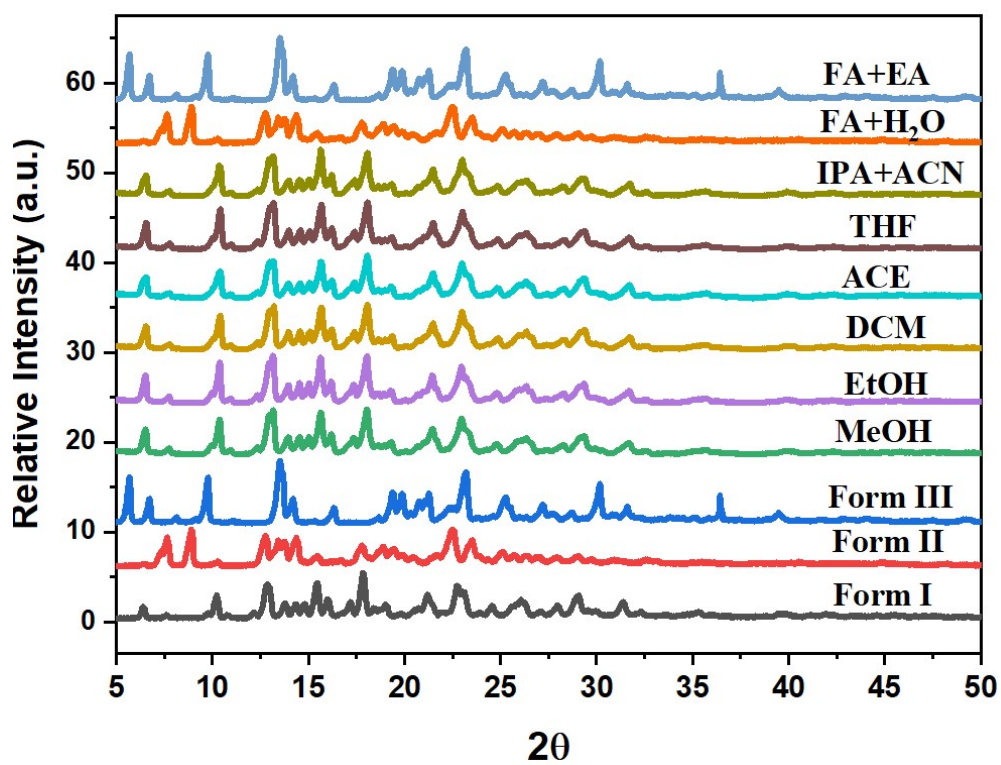

(a)

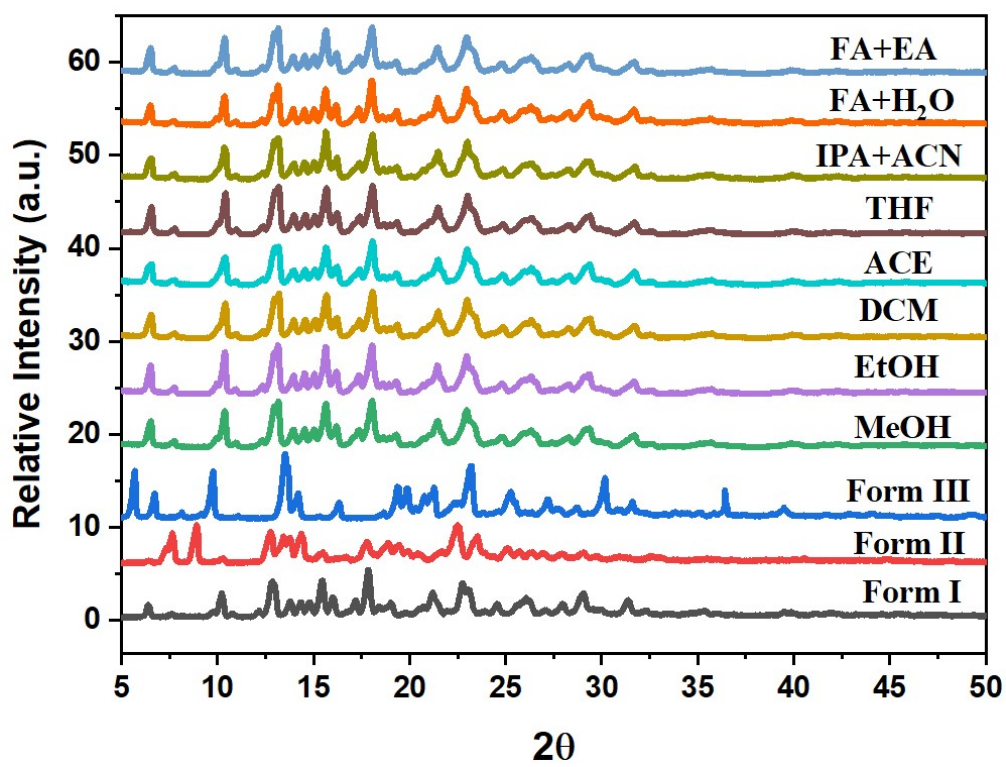

(b)

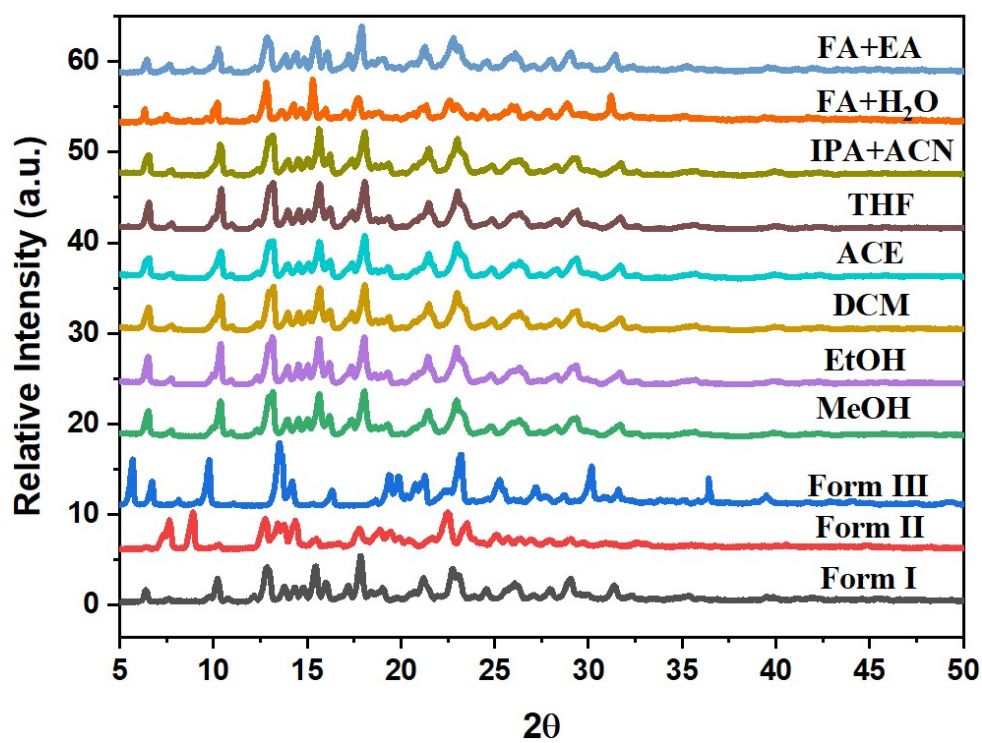

(c)

**Figure S4.** Illustration of the formation of distinct forms under varied reaction environments. (a) rotary evaporation, (b) liquid-assisted grinding (LAG) and (c) LAG followed by slow-evaporation.

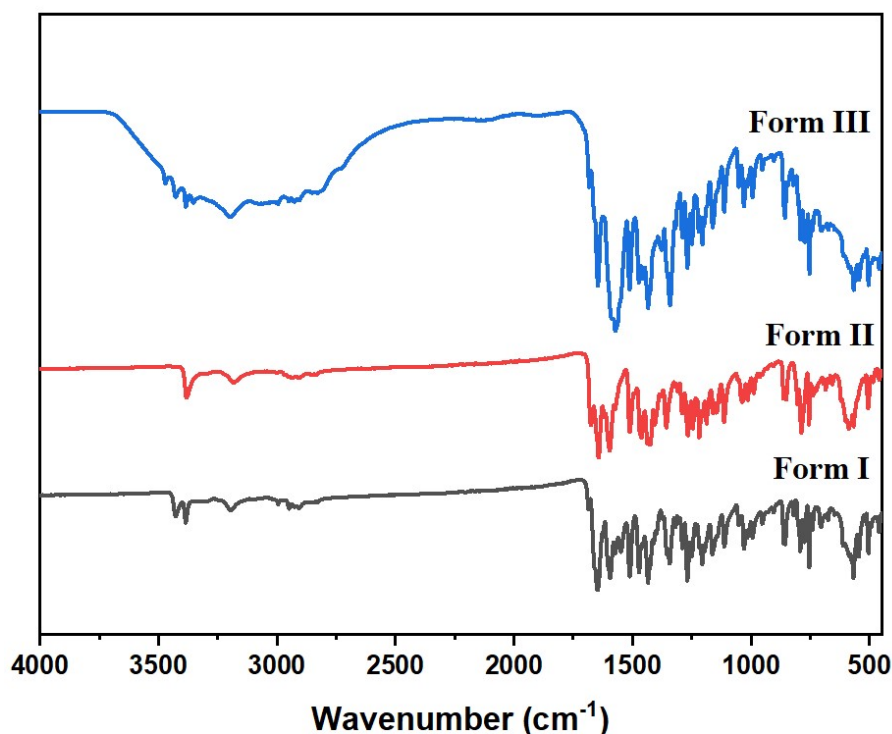

**Figure S5.** FT-IR spectra of various forms of ENSE.

### **<sup>1</sup>H and <sup>13</sup>C data of ENSE Forms**

#### **Form I**

<sup>1</sup>H NMR (400 MHz, DMSO-*d*<sub>6</sub>) δ ppm: 6.97 (s, 1H), 6.86 (s, 2H), 6.67 (s, 1H), 6.11 (t, *J* = 5.8 Hz, 1H), 5.46 (s, 2H), 5.33 (s, 1H), 4.19 (t, *J* = 6.8 Hz, 2H), 3.92 (t, *J* = 6.0 Hz, 2H), 3.81 (s, 3H), 3.62 (s, 3H), 3.18 (d, *J* = 5.2 Hz, 1H), 2.91 (t, *J* = 5.9 Hz, 2H), 2.23 (s, 3H), 1.98 (s, 6H).

<sup>13</sup>C NMR (101 MHz, DMSO-*d*<sub>6</sub>) δ ppm: 159.10, 152.19, 151.45, 148.64, 148.29, 144.53, 142.78, 131.07, 130.77, 128.86, 128.20, 119.36, 111.84, 109.05, 88.17, 56.55, 56.20, 41.97, 37.36, 27.50, 20.91, 18.49.

#### **Form II**

<sup>1</sup>H NMR (400 MHz, DMSO-*d*<sub>6</sub>) δ ppm: 6.97 (s, 1H), 6.86 (s, 2H), 6.67 (s, 1H), 6.11 (t, *J* = 5.8 Hz, 1H), 5.46 (s, 2H), 5.33 (s, 1H), 4.19 (t, *J* = 6.8 Hz, 2H), 3.92 (t, *J* = 6.0 Hz, 2H), 3.81 (s, 3H), 3.62 (s, 3H), 3.18 (d, *J* = 5.2 Hz, 1H), 2.91 (t, *J* = 5.9 Hz, 2H), 2.22 (s, 3H), 1.98 (s, 6H).

<sup>13</sup>C NMR (101 MHz, DMSO-*d*<sub>6</sub>) δ ppm: 159.10, 152.20, 151.45, 148.64, 148.30, 144.53, 142.78, 131.07, 130.77, 128.86, 128.21, 119.36, 111.85, 109.06, 88.17, 56.56, 56.20, 41.97, 27.51, 20.91, 18.49.

#### **Form III**

<sup>1</sup>H NMR (400 MHz, DMSO-*d*<sub>6</sub>) δ ppm: 6.96 (s, 1H), 6.85 (s, 2H), 6.67 (s, 1H), 6.11 (t, *J* = 5.8 Hz, 1H), 5.45 (s, 2H), 5.33 (s, 1H), 4.19 (t, *J* = 6.8 Hz, 2H), 3.91 (t, *J* = 6.5 Hz, 2H), 3.80 (s, 3H), 3.62 (s, 3H), 3.37 (d, *J* = 6.3 Hz, 2H), 2.90 (t, *J* = 5.9 Hz, 2H), 2.22 (s, 3H), 1.97 (s, 6H).

<sup>13</sup>C NMR (101 MHz, DMSO-*d*<sub>6</sub>) δ ppm: 159.09, 152.21, 151.45, 148.65, 148.31, 144.54, 142.78, 131.08, 130.76, 128.86, 128.20, 119.37, 111.86, 109.09, 88.17, 56.57, 56.21, 41.98, 37.37, 27.51, 20.91, 18.49.

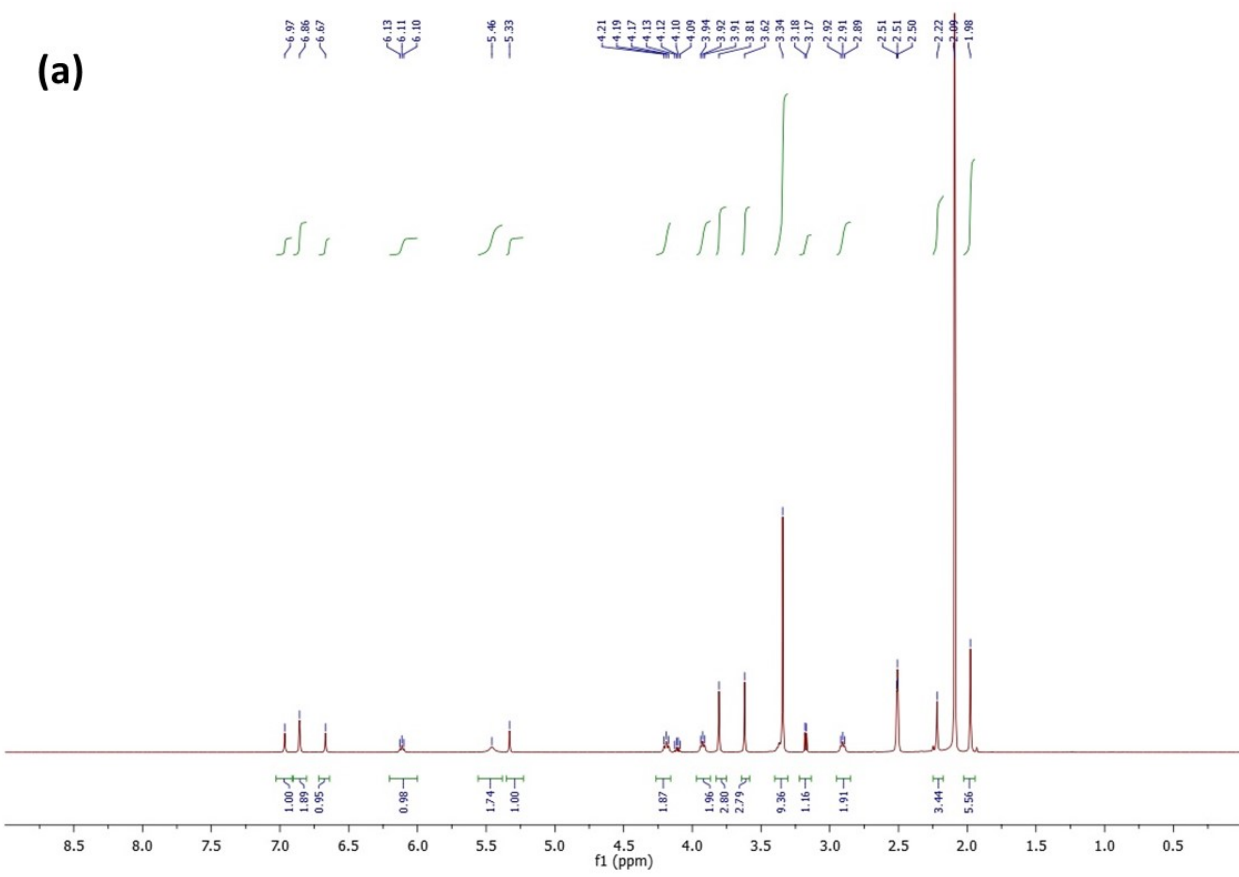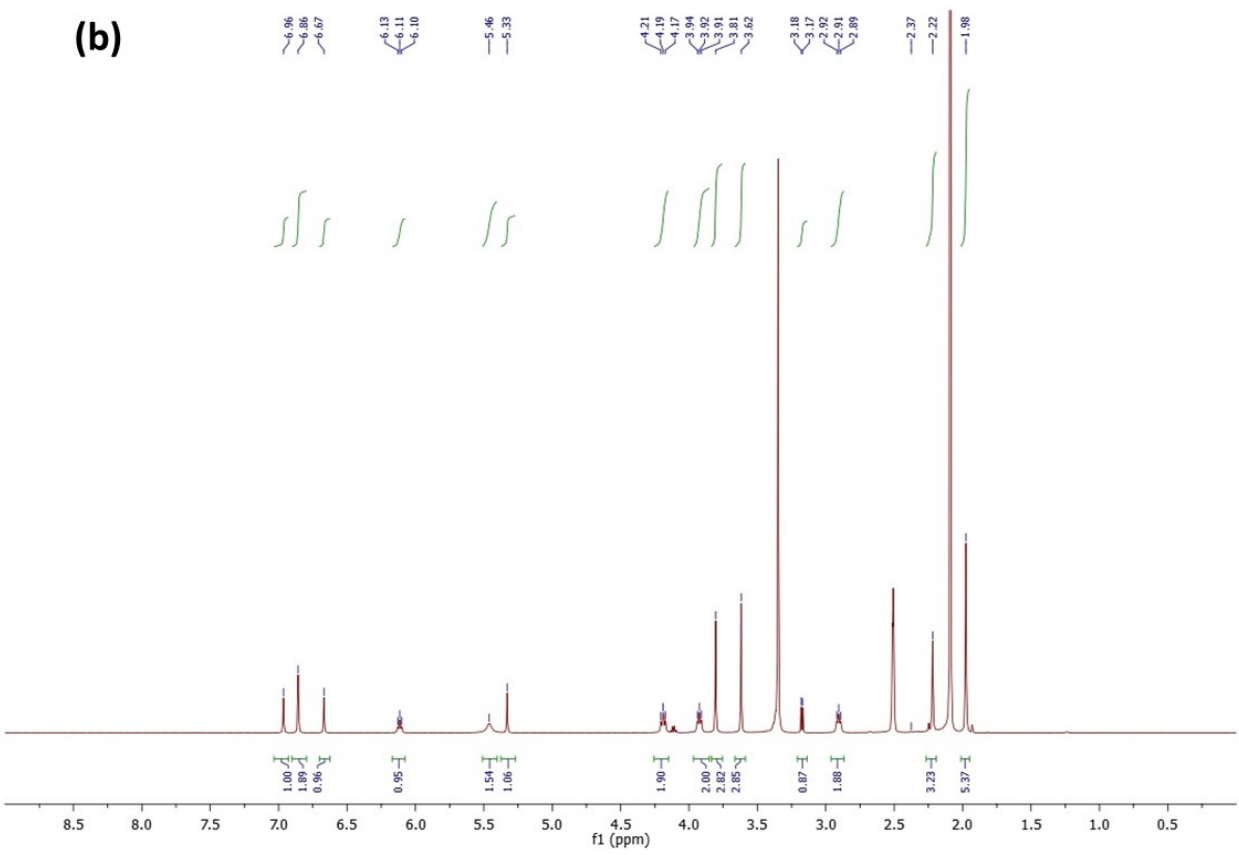



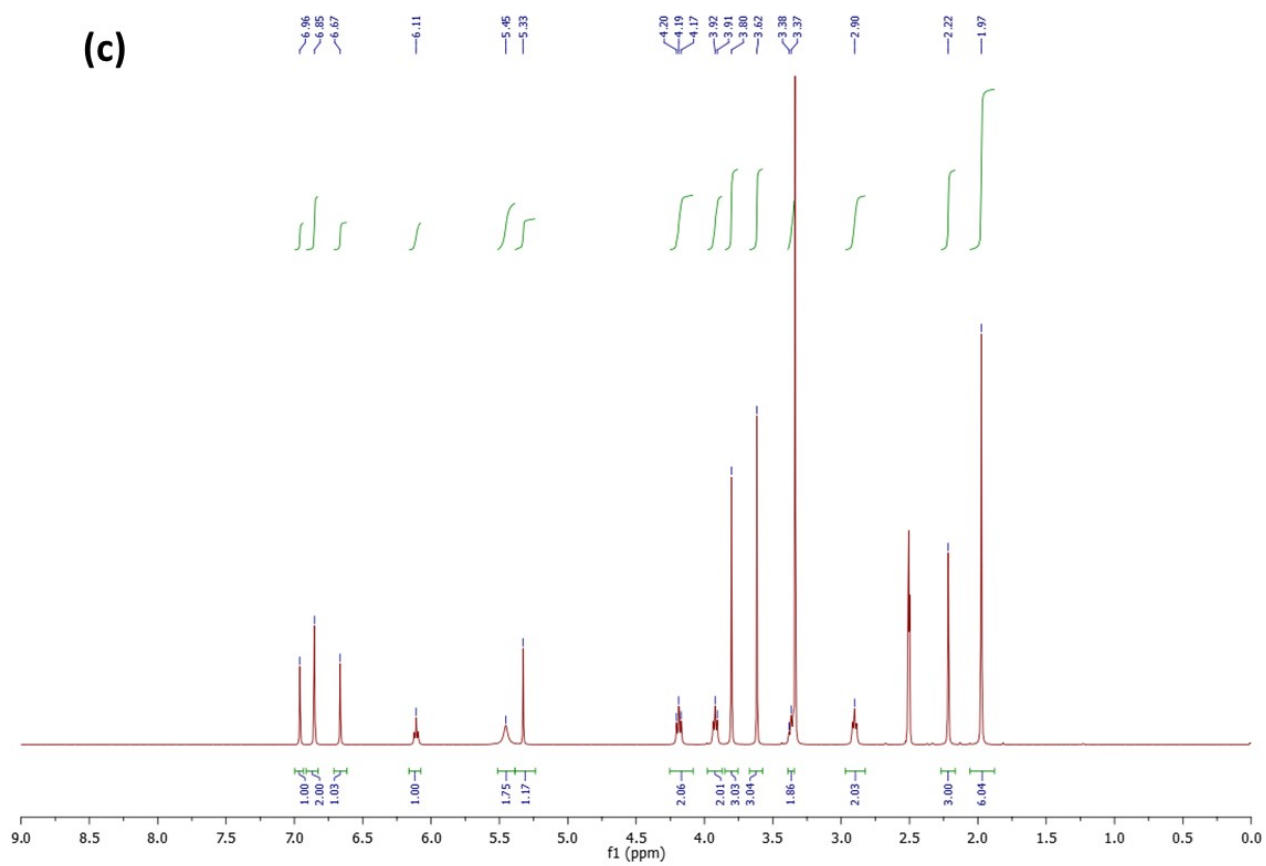

**Figure S6.** <sup>1</sup>H Spectra of (a) Form I, (b) Form II, and (c) Form III.

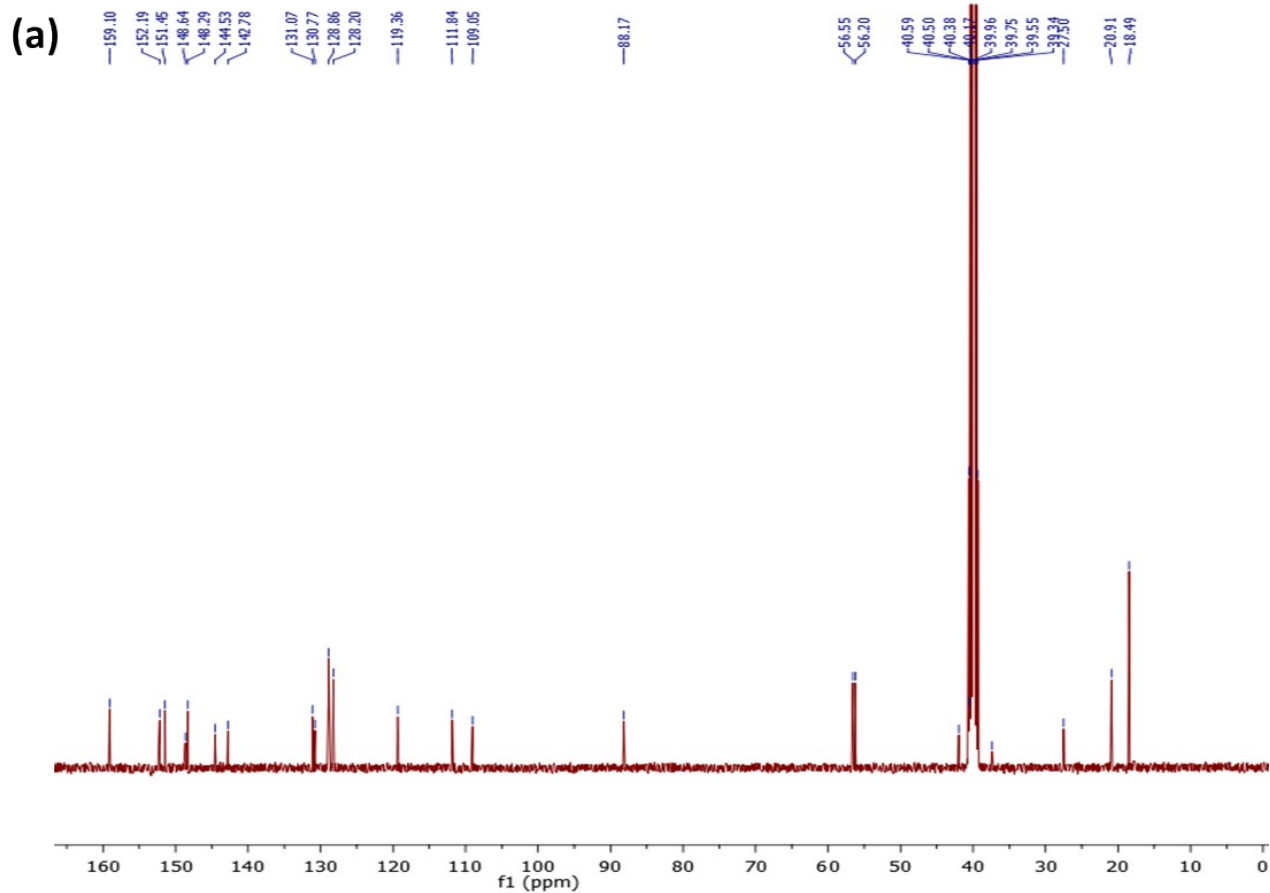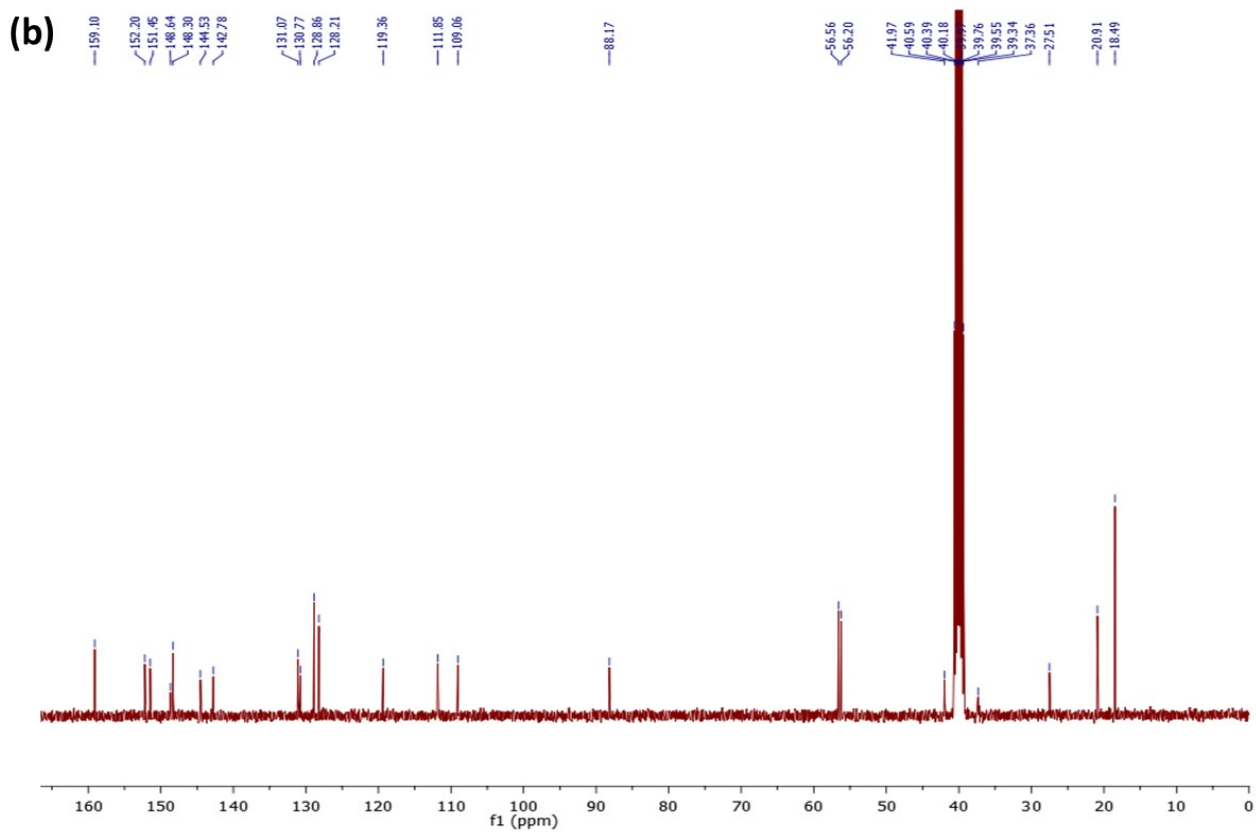

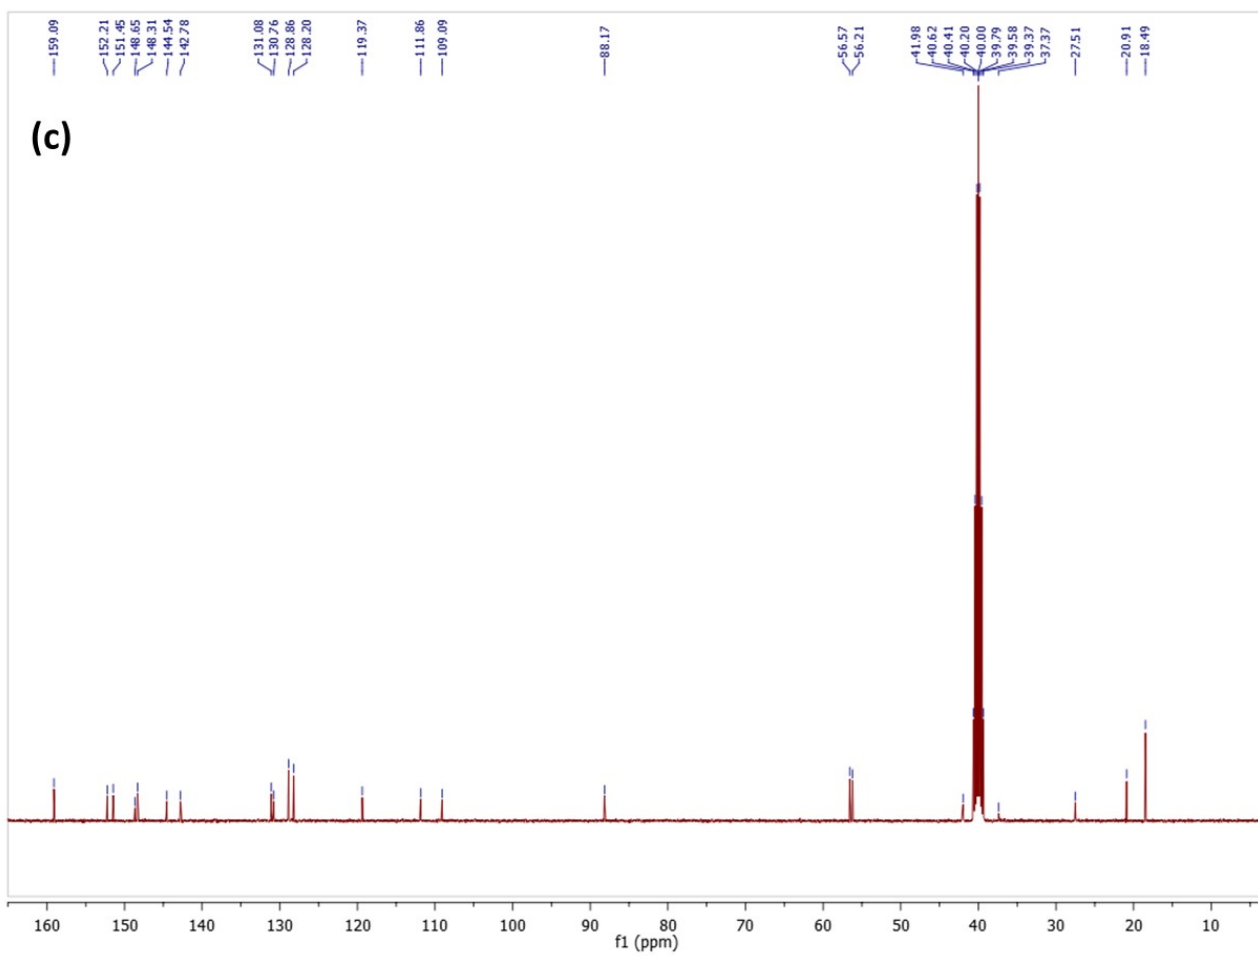

**Figure S7.**  $^{13}\text{C}$  Spectra of (a) Form I, (b) Form II, and (c) Form III.

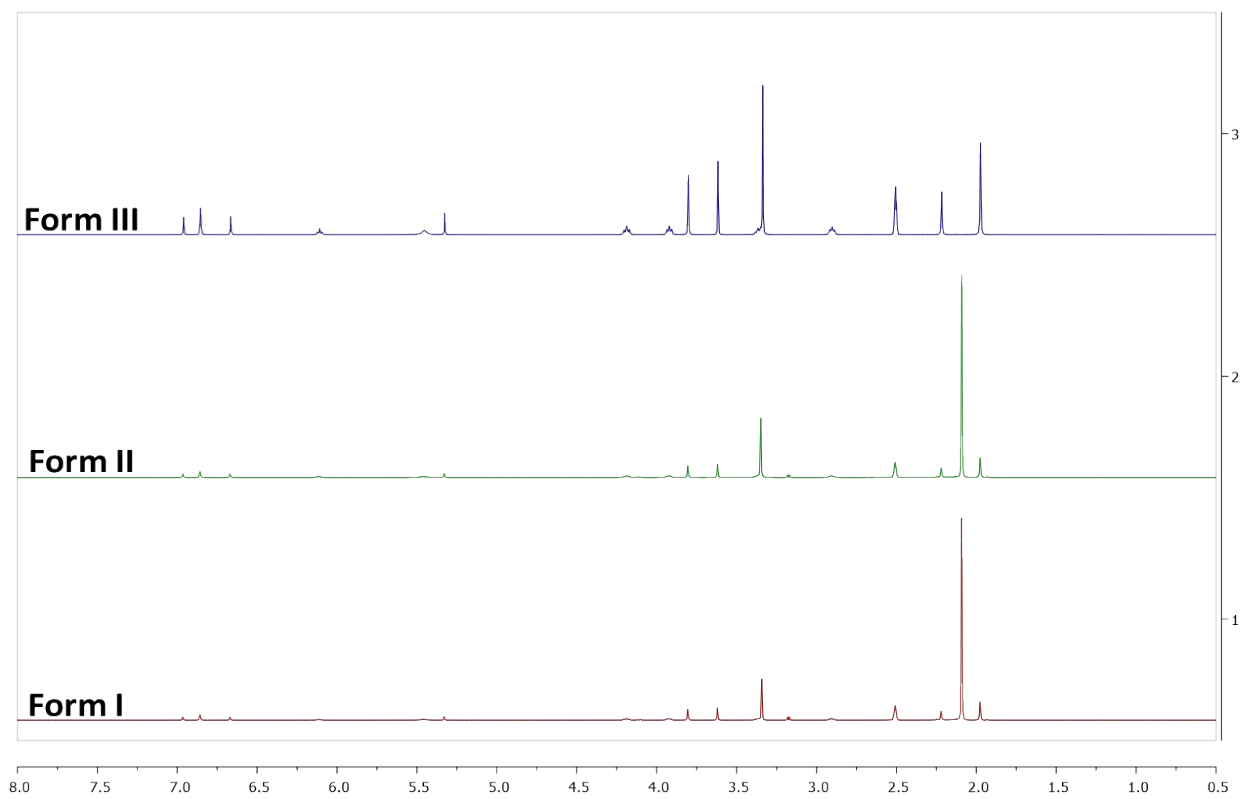

Figure S8. <sup>1</sup>H spectra overlay of all ENSE forms.

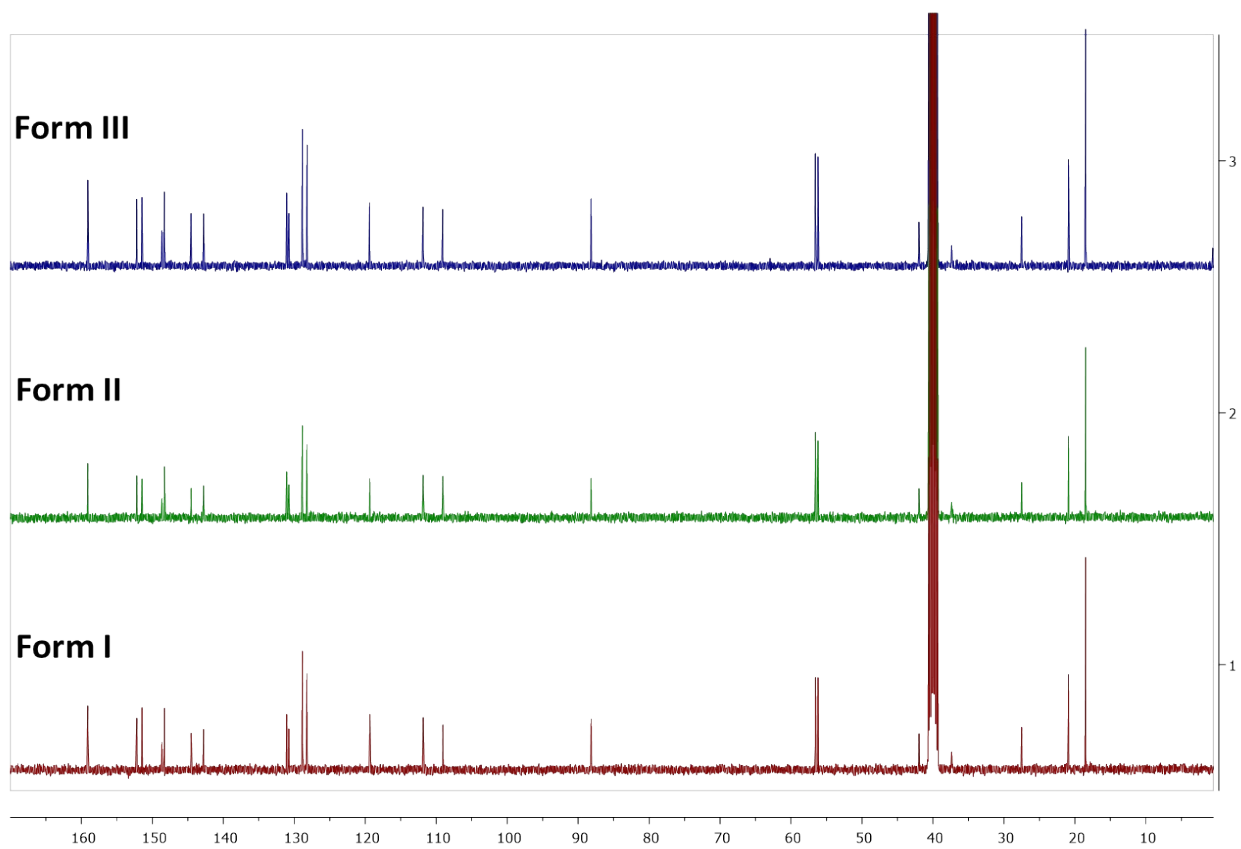

**Figure S9.**  $^{13}\text{C}$  spectra overlay of all ENSE forms.

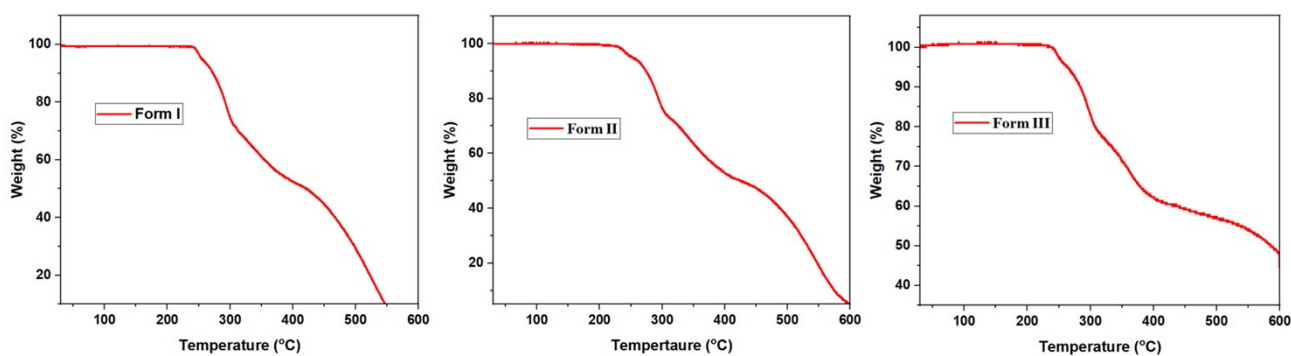

**Figure S10.** TGA profiles of various forms of ENSE.

### Details of the solubility parameters of solid forms of ENSE

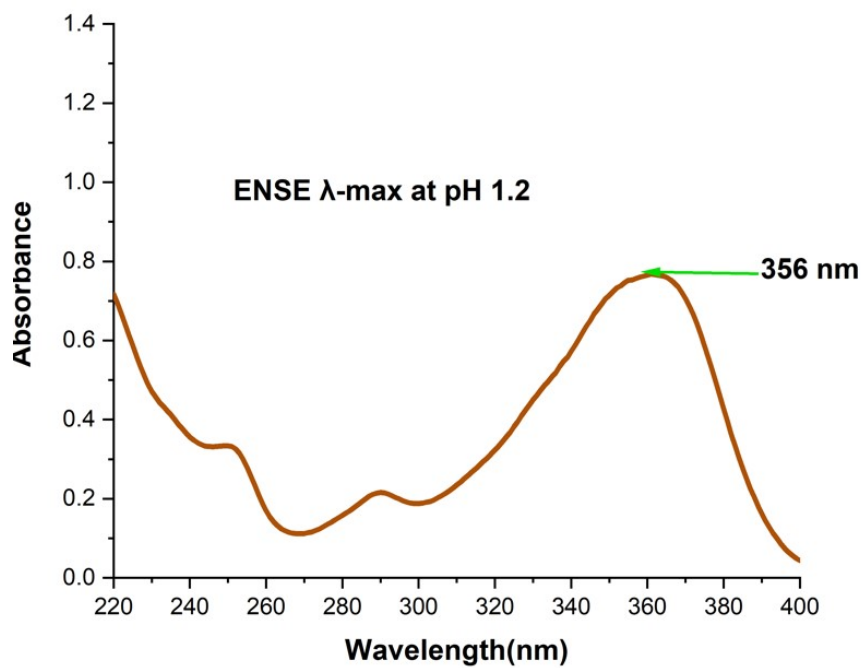

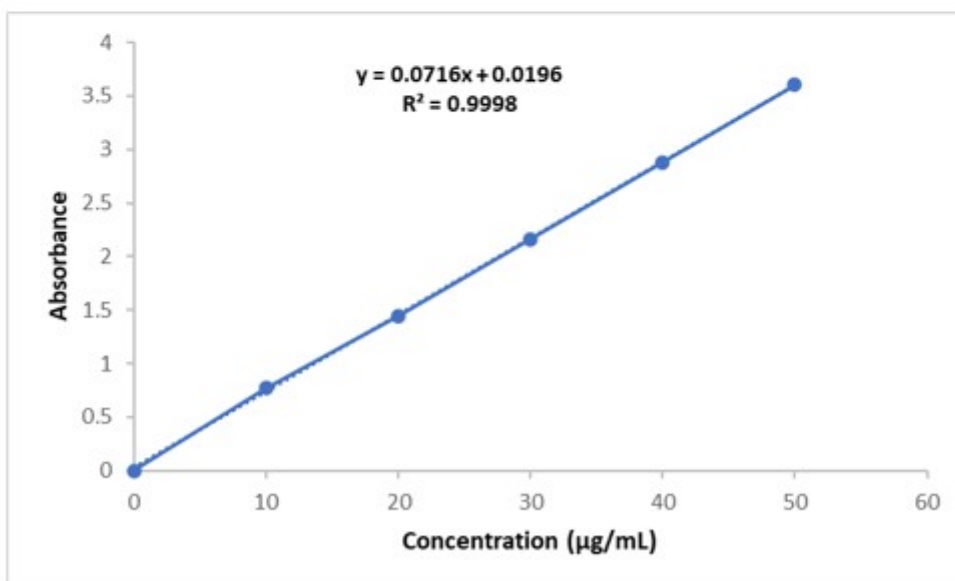

**Calibration graph of ENSE at pH 1.2.**

| S.No. | Sample Name | Absorbance |       |       | Estimated Standard Deviation | Average Absorbance | Average Concentration (mg/mL) | Final solid phase |
|-------|-------------|------------|-------|-------|------------------------------|--------------------|-------------------------------|-------------------|
| 1     | Form I      | 1.436      | 1.432 | 1.435 | 0.002                        | 1.434              | 19.795                        | SALT              |
| 2     | Form II     | 0.06       | 0.04  | 0.05  | 0.01                         | 0.05               | 0.6941                        | Form I            |
| 3     | Form III    | 0.012      | 0.013 | 0.014 | 0.001                        | 0.013              | 0.1753                        | Form I            |

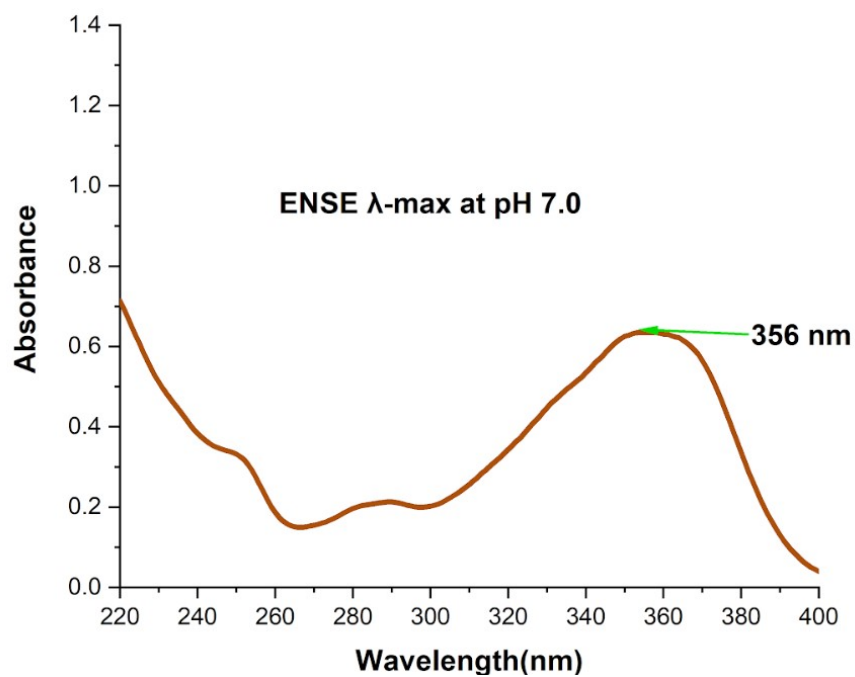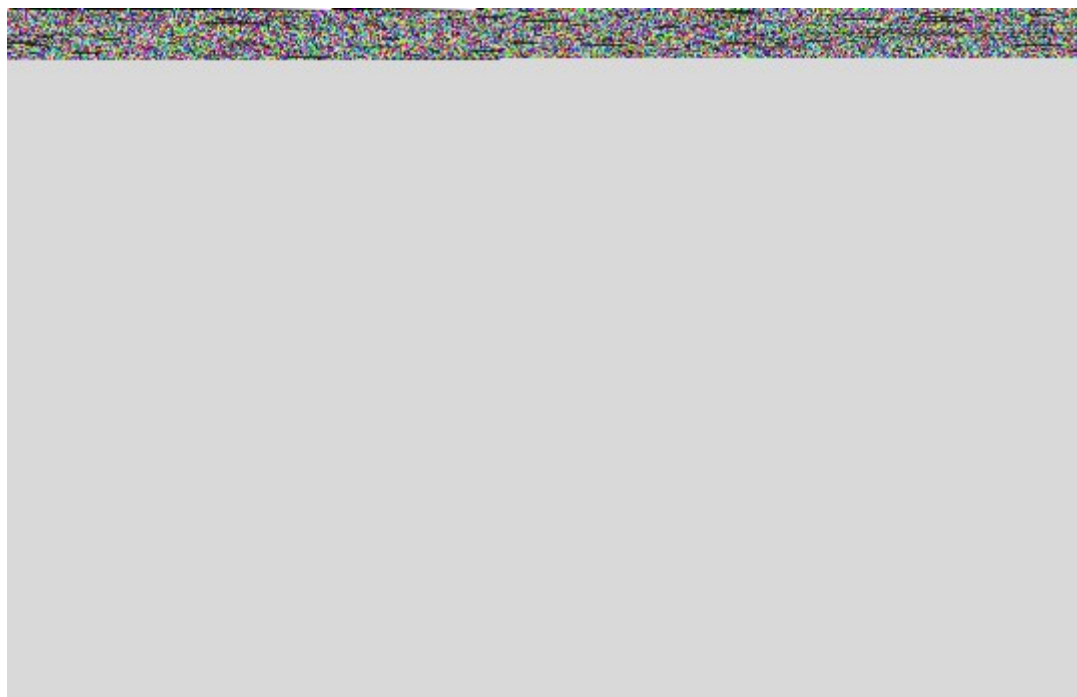

| S.No. | Sample Name | Absorbance |       |       | Estimated Standard Deviation | Average Absorbance | Average Concentration (mg/mL) | Final solid phase |
|-------|-------------|------------|-------|-------|------------------------------|--------------------|-------------------------------|-------------------|
|       |             |            |       |       |                              |                    |                               |                   |
| 1     | Form I      | 1.886      | 1.883 | 1.885 | 0.002                        | 1.884              | 0.029                         | Form I            |
| 2     | Form II     | 0.242      | 0.241 | 0.246 | 0.003                        | 0.243              | 0.004                         | Form I            |
| 3     | Form III    | 1.175      | 1.179 | 1.18  | 0.003                        | 1.177              | 0.741                         | Form I            |

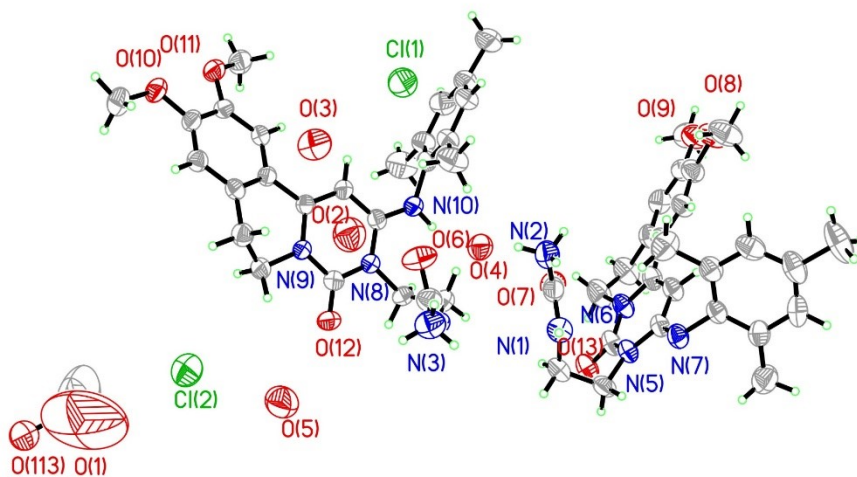

**Figure S11.** ORTEP view of ENSE.Cl Salt. Herein, the ellipsoids are drawn with a 50% probability.

**Table S2.** Crystallographic Parameters of ENSE.Cl.Salt.

| Parameters                   | ENSE.SALT                                                                              |
|------------------------------|----------------------------------------------------------------------------------------|
| Formula                      | 2(C <sub>26</sub> H <sub>32</sub> N <sub>5</sub> O <sub>4</sub> ). 1(C O). 2(Cl). 4(O) |
| $M_r$                        | 1120.04                                                                                |
| crystal shape                | Needle                                                                                 |
| crystal colour               | Colorless                                                                              |
| crystal system               | Triclinic                                                                              |
| space group                  | $P\bar{1}$                                                                             |
| $T$ , K                      | 273(2)                                                                                 |
| $\lambda$ (Mo-K $\alpha$ )/Å | 0.71073                                                                                |
| $a$ /Å                       | 12.371(8)                                                                              |
| $b$ /Å                       | 13.385(7)                                                                              |
| $c$ /Å                       | 17.690(2)                                                                              |
| $\alpha$ <sup>0</sup>        | 93.64(1)                                                                               |
| $\beta$ <sup>0</sup>         | 105.06(2)                                                                              |
| $\gamma$ <sup>0</sup>        | 91.16(1)                                                                               |
| $V$ /Å <sup>3</sup>          | 2821(2)                                                                                |
| $Z$                          | 2                                                                                      |
| $D_c$ / g cm <sup>-3</sup>   | 1.319                                                                                  |
| $\mu$ , mm <sup>-1</sup>     | 0.186                                                                                  |



|                                |                                                                      |
|--------------------------------|----------------------------------------------------------------------|
| $2\theta$ range [ $^{\circ}$ ] | 2.24-27.60                                                           |
| limiting indices               | $-16 \leq h \leq 16$<br>$-17 \leq k \leq 17$<br>$-23 \leq l \leq 23$ |
| $F(000)$                       | 1180                                                                 |
| total reflections              | 54109                                                                |
| unique reflections             | 13090                                                                |
| reflection at $I > 2\sigma(I)$ | 5756                                                                 |
| No. of parameters              | 728                                                                  |
| $R_1, I > 2\sigma(I)$          | 0.0751                                                               |
| $wR_2, I > 2\sigma(I)$         | 0.2536                                                               |
| GoF on $F^2$                   | 1.110                                                                |
| CCDC No.                       | 2349985                                                              |

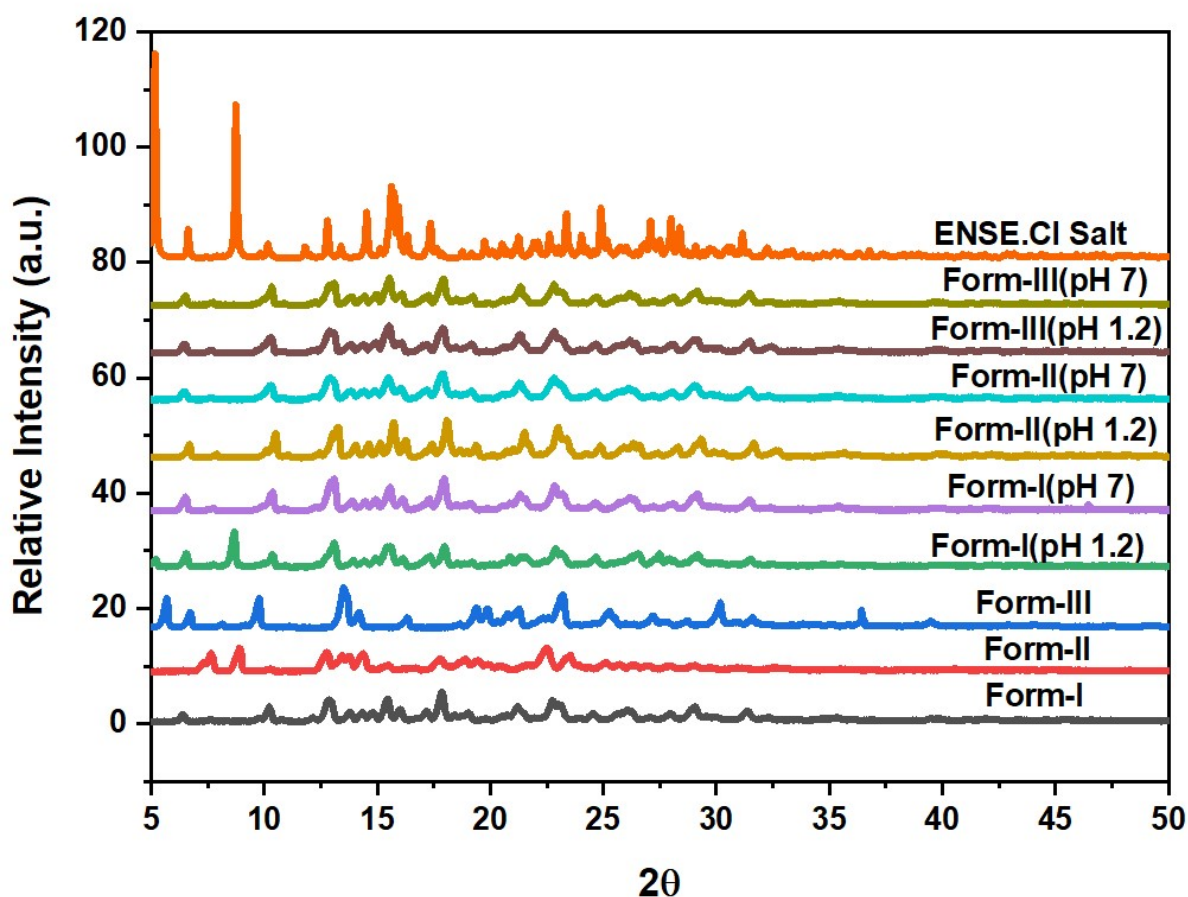

**Figure S12.** After the solubility test, a comparative PXRD overlay of all the solid forms of ENSE showed the production of discrete, stable adducts that matched the simulated pattern of ENSE.Cl Salt.
